# Supplementary material for: Prevalence of Psychological Distress Among Family Caregivers of Children with Cancer: A Systematic Review and Meta-Analysis
Source: Research Square preprint supplement (doi:10.21203/rs.3.rs-8369169/v1), 2026-01-24
Supplement: Supplementary file 1 [file 91b3d56219a95c67730d84f3.xlsx]

## Sheet: Meta-analysis 1 (anx)
n	ID	author_year	country	count	case	prevalence	classificatio	inst	n_sample	female_f	age_f	n_kids	famele_k	age_k	cancer
1	7	Yılancıoğlu (2024)	Turkey	Asia	22	0.5	serious	combined	44	0.95	39.5	44	0.54	9.5
2	12	Terrasson et al. (2023)	France	Europe	10	0.66	serious	combined	15	0.53	40.81	8		8.45
3	17	Hsu et al. (2021)	England	Europe	2	0.036	serious	combined	55	0.87	30.35	55	0.34	7.9	0.25
4	28	Wikman et al. (2018)	Sweden	Europe	2	0.015	serious	specific	132	0.51	38.9	74	0.47	7.8	0.36
5	35	Neu et al. (2014)	United States	America	5	0.19	serious	combined	26	1	32.4	26			1
6	38	Haegen et al. (2018)	Belgium	Europe	43	0.7	with symptoms	combined	61		45.02	61	0.3	13	0.26
7	42	Hannah Kurz et al. (2025)	German	Europe	172	0.337	with symptoms	specific	516	0.579	39.4	305	0.443	7.3	0.594
8	46	Quast et al. (2021)	United States	America	7	0.057	serious	specific	124	0.89			0.45	10	0.38
9	58	Jayaganapathy et al. (2020)	India	Asia	17	0.57	serious	combined	30	0.63	34.37
10	73	Koyu et al. (2020)	Turkey	Asia	29	0.168	serious	specific	172	0.989	34.98	172	0.51	7.47	0.38
11	74	Burns et al. (2020)	Russia	Europe	35	0.473	with symptoms	combined	74	0.92	34.49	74	0.36	7.55	0.92
12	77	McCarthy et al. (2021)	Australia	Oceania	10	0.13	with symptoms	combined	77	0.9	39.8	77	0.43	8.08
13	82	McLoone et al. (2013)	Australia	Oceania	15	0.29	with symptoms	combined	52	0.75	38.6	52	0.46	7.4	0.5
14	99	Peterson et al. (2018)	United States	America	18	0.19	serious	combined	96	0.83		96	0.51	9.81
15	100	Burns et al. (2018)	Canadá	America	13	0.063	with symptoms	combined	206	0.5		103	0.57
16	133	Zhao et al. (2023)	China	Asia	28	0.315	with symptoms	combined	91	0.49	30
17	138	Wilford (2018)	United States	America	26	0.23	serious	combined	112	0.94	38.8	112		7.8	0.39
18	157	I.Vlachos et al. (2023)	Greece	Europe	30	0.49	with symptoms	combined	61	0.85		61	0.49
19	23	Greening et al. (2007)	United States	America	12	0.07	with symptoms	specific	172	0.94	40.26		0.53	11.51	0.5

## Sheet: Meta-analysis 2 (dep)
n	ID	author_year	country	count	case	prevalence	classificatio	inst	n_sample	female_f	age_f	n_kids	famele_k	age_k	cancer
1	7	Yılancıoğlu (2024)	Turkey	Asia	34	0.773	serious	combined	44	0.95	39.5	44	0.54	9.5
2	12	Terrasson et al. (2023)	France	Europe	6	0.4	serious	combined	15	0.53	40.81	8		8.45
3	17	Hsu et al. (2021)	England	Europe	2	0.036	serious	combined	55	0.87	30.35	55	0.34	7.9	0.25
4	28	Wikman et al. (2018)	Sweden	Europe	2	0.015	serious	specific	132	0.51	38.9	74	0.47	7.8	0.36
5	35	Neu et al. (2014)	United States	America	1	0.04	serious	combined	26	1	32.4	26			1
6	38	Haegen et al. (2018)	Belgium	Europe	24	0.4	with symptoms	combined	61		45.02	61	0.3	13	0.26
7	58	Jayaganapathy et al. (2020)	India	Asia	16	0.53	serious	combined	30	0.63	34.37
8	73	Koyu et al. (2020)	Turkey	Asia	55	0.32	serious	specific	172	0.989	34.98	172	0.51	7.47	0.38
9	74	Burns et al. (2020)	Russia	Europe	36	0.4865	with symptoms	combined	74	0.92	34.49	74	0.36	7.55	0.92
10	77	McCarthy et al. (2021)	Australia	Oceania	10	0.13	with symptoms	combined	77	0.9	39.8	77	0.43	8.08
11	82	McLoone et al. (2013)	Australia	Oceania	13	0.25	with symptoms	combined	52	0.75	38.6	52	0.46	7.4	0.5
12	98	Elkin et al. (2007)	United States	America	7	0.259	with symptoms	specific	27	1		27	0.44	12.78	0.37
13	99	Peterson et al. (2018)	United States	America	12	0.12	serious	combined	96	0.83		96	0.51	9.81
14	100	Burns et al. (2018)	Canadá	America	10	0.048	with symptoms	combined	206	0.5		103	0.57
15	106	Vitorino et al. (2018)	Brazil	America	27	0.351	serious	specific	77	0.88	37.3
16	133	Zhao et al. (2023)	China	Asia	18	0.202	with symptoms	combined	91	0.49	30
17	138	Wilford (2018)	United States	America	90	0.8	serious	combined	112	0.94	38.8	112		7.8	0.39
18	153	Ghufran et al. (2014)	Pakistan	Asia	78	0.78	with symptoms	specific	100	1		100	0.25	6.9
19	157	I.Vlachos et al. (2023)	Greece	Europe	34	0.56	with symptoms	combined	61	0.85		61	0.49
20	3	Bemis et al. (2015)	United States	America	92	0.29	with symptoms	specific	318	1	37.5	151	0.51	13.5
21	13	Allen et al. (1997)	United States	America	11	0.1864	with symptoms	specific	61	0.55	44.5	43	0.34	15.4
22	15	Santo et al. (2011)	Brazil	America	2	0.0625	with symptoms	specific	32	0.875		32	0.531		0.581
23	23	Greening et al. (2007)	United States	America	2	0.01	with symptoms	specific	172	0.94	40.26		0.53	11.51	0.5

## Sheet: data extraction
Author (year)	ID	Author (year)	Title	Study design	objective	country	language	anxiety (n)	anxiety (%)	classification_Anx	metanalysis_anx	Anxiety (mean)	Anxiety (SD)	Depression (n)	Depression (%)	classification_Dep	metanalysis_dep	Depression (mean)	Depression (SD)	Anxiety (Instrument)	Depression (Instrument)	n families	female (%)	age (mean)	age (SD)	Education	Family income	Marital status	occupation	n children	female (%) kids	age_mean (kids)	age_SD (kids)	Type of cancer	Type of treatment	Treatment time
Yılancıoğlu (2024)	7	Yılancıoğlu (2024)	Onkoloji Servisinde Yatarak Tedavi Gören Çocukların Ruhsal Durumlarına Bakım Verenlerinin Etkisi	cross-sectional study	To evaluate the effect of caregivers on the mental health of children and adolescents undergoing hospital treatment for cancer.	Turkey	Turkish	22	0.5	serious	yes	0.83	0.79	34	0.773	serious	yes	1.17	0.88	Hospital Anxiety and Depression Scale (HADS)		44	0.95	39,5*		Elementary education (Mother 52% and Father 63%)				44	0.54	9.5	5.4	27% brain tumor	56% surgery
Terrasson et al. (2023)	12	Terrasson et al. (2023)	L’annonce de résistance au traitement en oncologie pédiatrique : une étude avec une méthodologie mixte pour comprendre l’expérience des parents et les facteurs qui l’influencent	cross-sectional study	Understand parents' experiences during this announcement and the relational and communication factors that may impact it.	France	French	10	0.66	serious	yes			6	0.4	serious	yes			Hospital Anxiety and Depression Scale (HADS)		15	0.53	40.81	7.56	40% higher education		93% married	80% Exercises professional activity	8		8.45	4.6	50% brain tumor
Hsu et al. (2021)	17	Hsu et al. (2021)	Health service and medication use of parents of childhood cancer survivors:a controlled comparison study	cross-sectional study	To investigate the nature and extent of health care and medication use by parents of survivors compared with a comparison group. We also aimed to examine whether demographic or cancer-related factors were related to health care use and whether health care use was associated with parents' overall functioning.	England	English	2	0.036	serious	yes	16.06	5.76	2	0.036	serious	yes	15.75	6.32	Patient-Reported Outcomes Measurement Information System (PROMIS)		55	0.87	30.35	6.03	40% higher education		87% married	67% part-time	55	0.34	7.9	4.43	25% leukemia	90% chemotherapy
Wikman et al. (2018)	28	Wikman et al. (2018)	Prevalence and predictors of symptoms of anxiety and depression, and comorbid symptoms of distress in parents of childhood cancer survivors and bereaved parents five years after end of treatment or a child’s death	longitudinal study	To investigate the prevalence and predictors of anxiety and depression symptoms in parents of childhood cancer survivors and bereaved parents five years after the end of treatment or the death of a child, and to investigate the comorbidity between symptoms of anxiety, depression, and post-traumatic stress.	Sweden	English	2	0.015	serious	yes	4.6	6.1	2	0.015	serious	yes	6	6.9	Beck Anxiety Inventory (BAI)	21-item Beck Depression Inventory-Second Edition (BDI-II)	132	0.51	38.9	6.6	48% high school				74	0.47	7.8	5.1	36% leukemia
Neu et al. (2014)	35	Neu et al. (2014)	Anxiety, Depression, Stress, and Cortisol Levels in Mothers of Children Undergoing Maintenance Therapy for Childhood Acute Lymphoblastic Leukemia	case-control study	To compare anxiety, depression, and stress among mothers of children undergoing maintenance treatment for acute lymphoblastic leukemia (ALL) and matched controls.	United States	English	5	0.19	serious	yes	7.7	4.3	1	0.04	serious	yes	5	3.5	Hospital Anxiety and Depression Scale (HADS)		26	1	32.4	6.8	27% higher education		85% married	46% part-time and full-time	26				100% leukemia	100% maintenance	15.2 (SD=8.5) months
Haegen et al. (2018)	38	Haegen et al. (2018)	Intolerance of uncertainty in parents of childhood cancer survivors: a clinical profile analysis	cross-sectional study	To investigate psychological adjustment related to the risk factor of intolerance of uncertainty in parents of childhood cancer survivors.	Belgium	English	43	0.7	serious/moderate	yes			24	0.4	serious/moderate	yes			Hospital Anxiety and Depression Scale (HADS)		61		45,02*		45% higher education		53% married/partner		61	0.3	13	5.93	26% leukemia
Hannah Kurz et al. (2025)	42	Hannah Kurz et al. (2025)	Beyond Treatment: Prevalence, Predictors, and Changes in Anxiety and Depression Among Parents of Childhood Cancer Survivors	longitudinal study	To assess the proportion of parents who present with clinically relevant symptoms of anxiety and/or depression, explore gender differences, examine factors associated with these conditions and their longitudinal data.	German	English	172	0.337	serious/moderate	yes	8	4.9	145	0.301	serious/moderate	no - data is not correct	7.4	5.2	Generalized Anxiety Disorder Scale (GAD-7)	Patient Health Questionnaire (PHQ-9)	516	0.579	39.4	7.3	50,4% over 10 years	46,1% average status	77,2% married	77,8% paid employee	305	0.443	7.3	4.3	59,4% leukemia
Quast et al. (2021)	46	Quast et al. (2021)	Psychosocial Functioning Among Caregivers of Childhood Cancer Survivors Following Treatment Completion	cross-sectional study	To characterize mental health-related quality of life (HRQoL) and caregiver anxiety and examine the influence of family psychosocial risk and caregiver problem-solving on these outcomes.	United States	English	7	0.057	serious	yes	50.66	10.67				no data			Patient-Reported Outcomes Measurement Information System (PROMIS)	Not applied	124	0.89			52% higher education	34% US$ 75,000–US$ 124,999				0.45	10	4.8	38% leukemia
Lewandowska et al. (2024)	53	Lewandowska et al. (2024)	Prevalence of Anxiety and Depression among Parents of Children with Cancer—A Preliminary Study	cross-sectional study	To assess the prevalence of anxiety and depression among parents of children with cancer.	Poland	English				no data			55	0.32	serious	no - data is not correct			Hospital Anxiety and Depression Scale (HADS-M) - Só dados p/ ansiedade	Beck Depression Inventory (BDI)	206	0.73			57% higher education	55% "good" financial situation	62% married			0.43	8.75	4.82	53% leukemia	89% chemotherapy	30% from 6 to 12 months
Jayaganapathy et al. (2020)	58	Jayaganapathy et al. (2020)	Association between cardiac sympathovagal indices and psychological status of recent pediatric oncology caregivers: A pilot study	cross-sectional study	To evaluate the association between cardiac sympathovagal indices and the psychological state of parents of children recently diagnosed with cancer.	India	English	17	0.57	serious	yes	19.07	8.82	16	0.53	serious	yes	26.8	7.47	21-item Depression Anxiety Stress Scale (DASS-21)		30	0.63	34.37	6.61											between 1 and 3 months
Christen et al. (2022)	63	Christen et al. (2022)	Worries and anxiety in parents of adult survivors of childhood cancer: A report from the Swiss Childhood Cancer Survivor Study-Parents	case-control study (population)	To compare worries and anxiety in parents of adult survivors of childhood cancer with parents from the Swiss general population (GP-parents) and to assess characteristics associated with worry in parents of survivors.	Switzerland	English	76	0.162	with symptoms	no - population data	13.3	11.98				no data			Worry and Anxiety Questionnaire (WAQ)	Not applied	487	0.59	62.3		48,5% higher education	55% Medium/high (≥6000 CHF)		53% employee	308	0.44			34,1% leukemia	55,2% chemotherapy
Meeske et al. (2013)	70	Meeske et al. (2013)	MENTAL HEALTH DISPARITIES BETWEEN HISPANIC AND NON- HISPANIC PARENTS OF CHILDHOOD CANCER SURVIVORS	cross-sectional study	To compare mental health outcomes in Hispanic and non-Hispanic parents of CCS.	United States	English			serious	no data			53	0.4	serious	no - data is not correct	14,41*	11.63	Not applied	Center for Epidemiological Studies Depression Scale (CES-D)	139	0.86	49,28*	6.4	33% elementary school*	41% 10–35 thousand	69% married		139	0.53			26,6% leukemia
Koyu et al. (2020)	73	Koyu et al. (2020)	The effect of physical and psychosocial symptoms on caregiver burden of parents of children with cancer	cross-sectional study	To investigate the effects of parental characteristics, physical and psychosocial symptoms, and child-related factors on caregiver burden for parents of children with cancer.	Turkey	English	29	0.168	serious	yes	51.9	8.09	55	0.32	serious	yes	22.09	22.09	State–Trait Anxiety Inventory (STAI)	Beck Depression Inventory (BDI)	172	0.989	34.98	5.99	34,9% elementary school	65% revenue equals expense		83% unemployed	172	0.51	7.47	4.92	38% leukemia	58% in treatment
Burns et al. (2020)	74	Burns et al. (2020)	Pediatric psycho‐oncology in Russia: Caregiver mental health and sleep outcomes on the oncology wards	case-control study	To determine the prevalence of psychological distress among Russian caregivers and identify factors associated with caregiver sleep duration during their stay in the pediatric oncology ward.	Russia	English	35	0.473	serious/moderate	yes	9.54	7.28	36	0.4865	serious/moderate	yes	13.78	8	Depression Anxiety Stress Scales‐21 (DASS‐21)		74	0.92	34.49	9.04	52% with education ("Degree")		90% single	3,20 (SD=10,48) hours of paid work	74	0.36	7.55	5.32	92% leukemia
McCarthy et al. (2021)	77	McCarthy et al. (2021)	Parental adjustment following their child’s completion of acute lymphoblastic leukemia treatment	case-control study	To characterize the suffering of parents 3 months after the end of their children's ALL treatment.	Australia	English	10	0.13	with symptoms	yes	3.6	4.5	10	0.13	with symptoms	yes	5.3	5.3	Depression, anxiety, stress scale - short form (DASS-21)		77	0.9	39.8	5.2	29% higher education		83% married	34% part-time	77	0.43	8.08	3.5
McLoone et al. (2013)	82	McLoone et al. (2013)	Parental sleep experiences on the pediatric oncology ward	case-control study	To provide the first prevalence estimates of self-reported sleep quantity and quality among parents accommodated on the pediatric oncology ward, compared with parents of age-matched controls.	Australia	English	15	0.29	serious/moderate	yes	6.64	6.3	13	0.25	serious/moderate	yes	9.47	7.4	21-item Depression Anxiety Stress Scale (DASS-21)		52	0.75	38.6	5.8	57% with education ("No degree")		92% partner	2,10 (SD=0,78) hours of paid work	52	0.46	7.4	5.3	50% leukemia
Elkin et al. (2007)	98	Elkin et al. (2007)	Religiosity and Coping in Mothers of Children Diagnosed With Cancer: An Exploratory Analysis	cross-sectional study	To provide preliminary data on the religious beliefs and behaviors of mothers of children with cancer and the relationship with their psychological adjustment.	United States	English				no data			7	0.259	serious/moderate	yes	13.7	12.4	Not applied	Beck Depression Inventory–II (BDI-II)	27	1					56% partner		27	0.44	12.78	4.1	37% leukemia		median treatment time was 17 months
Peterson et al. (2018)	99	Peterson et al. (2018)	Predicting parental distress among children newly diagnosed with craniopharyngioma	longitudinal study	To investigate parental distress in a sample of families of patients with CP to identify clinical and cognitive factors associated with targeted intervention.	United States	English	18	0.19	serious	yes	52.66	10.75	12	0.12	serious	yes	52.38	8.9	Brief Symptom Inventory (BSI)		96	0.83							96	0.51	9.81	4.42	100% brain tumor
Burns et al. (2018)	100	Burns et al. (2018)	Cancer-related effects on relationships, long- term psychological status and relationship satisfaction in couples whose child was treated for leukemia: A PETALE study	cross-sectional study	1) describe parental adjustment (psychological distress, relationship satisfaction; 2) describe the perceived impact of cancer on the couples' relationship; and; 3) identify the extent to which the perceived impact of cancer on the couple is related to the long-term adjustment of both parents.	Canadá	English	13	0.063	with symptoms	yes	46,47*	9.08	10	0.048	with symptoms	yes	44*	7.49	Brief Symptom Inventory (BSI)		206	0.5	51 e 54 anos		46% higher education	47% income over $49,999	100% married	69% full time	103	0.57
Vernon et al. (2016)	105	Vernon et al. (2016)	Infancy and pediatric cancer: an exploratory study of parent psychological distress	cross-sectional study	To examine the rates and risk factors indicative of psychological distress in parents where there is an infant patient or infant sibling of a patient.	Australia	English	9*	0.1363	serious	no - data identified by the author			8*	0.1212	serious	no - data identified by the author			21-item Depression Anxiety Stress Scale (DASS-21)		66	0.62	36,87*		75% higher education*		45% married*		66				31% solid tumor*
Vitorino et al. (2018)	106	Vitorino et al. (2018)	Spiritual and Religious coping and depression among family caregivers of pediatric cancer patients in Latin America	cross-sectional study	To investigate whether Positive and Negative CRE strategies are associated with depressive symptoms in spiritual/religious coping of pediatric cancer patients in Brazil.	Brazil	English				no data			27	0.351	serious	yes			Not applied	Beck Depression Inventory (BDI)	77	0.88	37.3	11.21		53,2% financial problems		81% Employed/Retired						100% chemotherapy	at least 6 months
Zhao et al. (2023)	133	Zhao et al. (2023)	Relating caregiver experiences to personalized “push” content in mobile applications among caregivers of pediatric patients with oncology conditions	cross-sectional study	To evaluate the influence of health-related content delivered through mobile applications on the anxiety and depression levels of caregivers of pediatric oncology patients.	China	English	28	0.315	with symptoms	yes			18	0.202	with symptoms	yes			Hospital Anxiety and Depression Scale (HADS)		91	0.49	30		34% high school								33% neuroblastoma
Wilford (2018)	138	Wilford (2018)	Supportive use of social media among parents of childhood cancer survivors	cross-sectional study	To investigate how parents of childhood cancer survivors use social media for support.	United States	English	26	0.23	serious	yes	63.8	6.8	90	0.8	serious	yes	53.4	9.9	Patient-Reported Outcomes Measurement Information System (PROMIS)		112	0.94	38.8	6.5	64% higher education		86% married		112		7.8	3.1	39% leukemia	95% chemotherapy
Ghufran et al. (2014)	153	Ghufran et al. (2014)	Frequency and severity of depression among mothers of children with cancer: Results from a teaching hospital in Karachi, Pakistan	cross-sectional study	To investigate the frequency and severity of depression in mothers of children with cancer.	Pakistan	English				no data			78	0.78	with symptoms	yes			Not applied	Hamilton Depression Rating Scale (HAM-D 17)	100	1			55% higher education	65% over 50,000		95% housewife	100	0.25	6.9	3.4		57% in treatment
I.Vlachos et al. (2023)	157	I.Vlachos et al. (2023)	Psychosocial adaptation of families with children newly diagnosed with cancer in the Greek population amidst the socioeconomic crisis	cross-sectional study	To present an initial assessment of psychosocial adjustment among Greek parents whose children were diagnosed with cancer amidst the turmoil of an ongoing financial crisis.	Greece	English	30	0.49	serious/moderate	yes	11	5	34	0.56	serious/moderate	yes	11	4	Hospital Anxiety and Depression Scale (HADS)		61	0.85			48% elementary school		92% partner		61	0.49			56% hematological
Bemis et al. (2015)	3	Bemis et al. (2015)	Childhood Cancer in Context: Sociodemographic Factors, Stress, and Psychological Distress Among Mothers and Children	cross-sectional study	To examine the associations between sociodemographic factors (marital status, family income, education, race), stress (general and cancer-related), and psychological distress (depressive and post-traumatic stress symptoms) in children with cancer and their mothers during the first year after diagnosis or recurrence.	United States	English				no data			92	0.29	serious/moderate	yes	15.2	10.5	Not applied	21-item Beck Depression Inventory-Second Edition (BDI-II)	318	1	37.5	7.1	13.9 (SD = 2.3; 7–22) average years of schooling	26,8% $25.001–50.000	72,6% married/partner		151	0.51	13.5	2.4	34,4% lymphoma
Katz et al. (2018)	11	Katz et al. (2018)	Trajectories of Child and Caregiver Psychological Adjustment in Families of Children With Cancer	longitudinal study	To describe the mental health trajectory of patients and caregivers from diagnosis to the first year of treatment for pediatric cancer and to assess whether rates of clinically relevant symptoms were elevated compared to norms.	United States	English	60	0.455	with symptoms	no - data is not correct	3.88	3.83	98	0.743	with symptoms	no - data is not correct	13.84	5.76	21-item Depression Anxiety Stress Scale (DASS-21)	Center for epidemiological studies depression scale (CESD)	159	0.855					78,3% married		159	0.51	6.3	3.5	32,8% leukemia		all 2 weeks after diagnosis
Allen et al. (1997)	13	Allen et al. (1997)	Anxiety and Depression in Adolescent Cancer: Findings in Patients and Parents at the Time of Diagnosis	longitudinal study	To assess the psychological impact of a cancer diagnosis on adolescent patients and their families.	United States	English				no data	43.64	10.4	11	0.1864	severe/moderate	yes	10.77	7	State-Trait Anxiety Inventory (STAI)	Beck Depression Inventory (BDI)	61	0.55	44,5*						43	0.34	15.4		67% sarcoma
Santo et al. (2011)	15	Santo et al. (2011)	Cuidando da criança com câncer: avaliação da sobrecarga e qualidade de vida dos cuidadores	cross-sectional study	To assess the care burden and quality of life (QoL) of caregivers of children/adolescents with cancer during chemotherapy treatment.	Brazil	Portuguese				no data			2	0.0625	with symptoms	yes			Not applied	Beck Depression Inventory (BDI)	32	0.875			59,4% completed primary education		75% married	65,6 of the home	32	0.531			58,1% leukemia
Greening et al. (2007)	23	Greening et al. (2007)	Brief Report: Pediatric Cancer, Parental Coping Style, and Risk for Depressive, Posttraumatic Stress, and Anxiety Symptoms	cross-sectional study	To evaluate the Kindness Fit Model of stress and coping across a broader range of symptoms, including depressive symptoms, PTSD, and anxiety among parents of children diagnosed with cancer.	United States	English	12	0.07	with symptoms	yes	43.67	23.24	2	0.01	with symptoms	yes	9.67	8.89	State-Trait Anxiety Inventory (STAI)	21-item Beck Depression Inventory-Second Edition (BDI-II)	172	0.94	40.26				60% married			0.53	11.51		50% leukemia		24.10 months

## Sheet: risk of bias
		Yes	No	Uncertain
	D1	0.3	0.267	0.433
	D2	0.067	0.867	0.067
	D3	0.2	0.8
	D4	0.2	0.267	0.533
	D5	0.167	0.467	0.367
	D6	1
	D7	0.467	0.133	0.4
	D8	0.233	0.167	0.6
	D9	0.467	0.367	0.167

## Sheet: children's information
	Types of cancer
	Author (year)	n sample	Leukemia	Lymphomas	CNS tumor	Sarcoma	Neuroblastoma
	Yılancıoğlu (2024)	44	0.205		0.273		0.045
	Terrasson et al. (2023)	13			0.538	0.154
	Hsu et al. (2021)	55	0.255	12, 70%	0.2	0.145	0.109
	Wikman et al. (2018)	74	0.365		0.081
	Neu et al. (2014)	21	1
	Haegen et al. (2018)	61	0.264	0.132		0.245
	Hannah Kurz et al. (2025)	305	0.62		0.33
	Quast et al. (2021)	124	0.38	0.16	0.01	0.16	0.07
	Lewandowska et al. (2024)	206	0.53	0.29	0.07		0.06
	Christen et al. (2022)	308	0.341	0.227	0.12
	Meeske et al. (2013)	139	0.29	0.2	0.13
	Koyu et al. (2020)	172	0.384	0.105	0.134	0.22	0.087
	Burns et al. (2020)	70	0.929	0.029
	McCarthy et al. (2021)	77	1
	McLoone et al. (2013)	52	0.5	0.115
	Elkin et al. (2007)	18	0.667				0.056
	Burns et al. (2018)	103	1
	Vernon et al. (2016)	23	0.13		0.043
	Zhao et al. (2023)	91					0.33
	Wilford (2018)	114	0.46		0.17	0.11
	I.Vlachos et al. (2023)	61		0.557
	Bemis et al. (2015)	318	0.36	0.249
	Katz et al. (2018)	159	0.328	0.126	0.185
	Allen et al. (1997)	42	0.12	0.19
	Santo et al. (2011)	32	0.581
	Greening et al. (2007)	172	0.5	0.18			0.09
	Source: own authorship (2025).
	Type of treatment
	Author (year)	n sample	Chemotherapy	Radiotherapy	Surgeries	Transplants
	Yılancıoğlu (2024)	44			0.568
	Hsu et al. (2021)	55	0.909	0.309	0.545	0.127
	Quast et al. (2021)	124	1
	Lewandowska et al. (2024)	206	0.89	0.28	0.25
	Christen et al. (2022)	308	0.552	0.263	0.12	0.062
	Burns et al. (2018)	103	0.621
	Vitorino et al. (2018)	77	1
	Santo et al. (2011)	32	1
	Greening et al. (2007)	172	0.93	0.37		0.07
	Source: own authorship (2025).

## Sheet: excluded studies
Database Studies				Gray Literature Studies
Author (year)	Title	Reason for exclusion		Author (year)	Title	Reason for exclusion		Reason for exclusion:
Sim et al. (2024)	Multilevel Social Determinants of Patient-Reported Outcomes in Young Survivors of Childhood Cancer	1		In Jung Sohn et al. (2017)	Factors Associated with Emotional Distress in Children and Adolescents during Early Treatment for Cancer	4		[1] No information on family members' psychological distress;
Dolan et al. (2021)	Association of psychological distress and religious coping tendencies in parents of children recently diagnosed with cancer: A cross-sectional study	1		Heide Götze et al (2014)	Psychological distress and quality of life of palliative cancer patients and their caring relatives during home care	2		[2] The target population of the research should not be family members of children with cancer;
Oppenheim et al. (2000)	Comentário les parents apprécient-ils un hôpital de jour en oncologie pédiatrique	1		R. D. Nipp et al. (2016)	Factors associated with depression and anxiety symptoms in family caregivers of patients with incurable cancer	2		[3] Grieving family members (e.g., deceased children);
Lundgren et al. (2025)	“It is today that counts, and today everything is fine”: coping strategies utilized by parents of children treated for cancer who seek psychological support - a qualitative study	1		Robinson et al. (2007)	Parent and Family Factors Associated with Child Adjustment to Pediatric Cancer	1		[4] Studies that are not observational in nature, such as intervention studies (e.g., clinical trials) or reviews (e.g., systematic or scoping studies);
Horan et al. (2024)	Multilevel Characteristics of Cumulative Symptom Burden in Young Survivors of Childhood Cancer	1		Florencia Borrescio-Higa et al. (2022)	The Psychosocial Burden of Families with Childhood Blood Cancer	1		[5] Protocol materials, instrument validation, abstracts, letters, or books;
Lietaviete and Martinsone (2024)	Illness cognitions and parental stress symptoms following a child’s cancer diagnosis	1		McCarthy et al. (2016)	Psychological Distress and Posttraumatic Stress Symptoms in Adolescents and Young Adults with Cancer and Their Parents	1		[6] No numerical (percentage) information on psychological distress and/or qualitative information (e.g., interviews);
Yanran Li et al. (2023)	A latent class analysis of resilience and its association with patient-reported symptoms in patients with esophageal cancer after esophagectomy	1		Bruce E. Compas et al. (2014)	Children and Adolescents Coping With Cancer: Self- and Parent Reports of Coping and Anxiety/Depression	2		[7] No use of a measuring instrument to investigate psychological distress
Hagström et al. (2022)	Opt-out rates and reasons for non- participation in a single-arm feasibility trial (ENGAGE) of a guided internet- administered CBT-based intervention for parents of children treated for cancer: a nested cross-sectional survey	1		Areia et al. (2018)	Psychological morbidity in family caregivers of people living with terminal cancer: Prevalence and predictors	2
Nicklin et al. (2022)	Long‐term unmet supportive care needs of teenage and young adult (TYA) childhood brain tumour survivors and their caregivers: a cross‐sectional survey	1		Sibel Eyigor et al. (2011)	The Quality of Life and Psychological Status of Mothers of Hospitalized Pediatric Oncology Patients	6
Okada et al. (2022)	The maternal employment status after the completion of their child's cancer treatment: A cross-sectional exploratory study	1		Anneke Ullrich et al. (2017)	Quality of life, psychological burden, needs, and satisfaction during specialized inpatient palliative care in family caregivers of advanced cancer patients	2
Sisk et al. (2020)	The Evolution of Regret: Decision Making for Parents of Children with Cancer	1		David W. Kissane et al. (1994)	Morbidade psicológica nas famílias de pacientes com câncer	2
Fischer et al. (2021)	A Cross-Sectional Examination of Caregiver Mental Health and Childhood Cancer Survivors’ Tobacco, Alcohol and Marijuana Use	1		Gea A. Huizinga et al. (2003)	Psychosocial Consequences for Children of a Parent With Cancer	1
Greenzang et al. (2018)	Parental Distress and Desire for Information Regarding Long-Term Implications of Pediatric Cancer Treatment	1		Oechsle et al. (2020)	Prevalence and Predictors of Distress, Anxiety, Depression, and Quality of Life in Bereaved Family Caregivers of Patients With Advanced Cancer	3
Szymczak et al. (2018)	Identifying patient- and family-centered outcomes relevant to inpatient versus at-home management of neutropenia in children with acute myeloid leukemia	1		Yun-Hsiang Lee et al. (2013)	Anxiety, depression and related factors in family caregivers of newly diagnosed lung cancer patients before first treatment.	2
Barrera e Pinto (2009)	Behavioral, Social, and Educational Outcomes After Pediatric Stem Cell Transplantation and Related Factors	1		Kazak et al. (1997)	Posttraumatic Stress, Family Functioning, and Social Support in Survivors of Childhood Leukemia and TTheir Mothers and Fathers	2
Harper et al. (2013)	Longitudinal study of parent caregiving self-efficacy and parent stress reactions with pediatric cancer treatment procedures	1		Kathryn E. Grant et al. (1995)	Stress and Anxious-Depressed Symptoms Among Adolescents: Searching for Mechanisms of Risk	1
Khalifa et al. (2014)	Psychiatric morbidity in Egyptian children with acute lymphoblastic leukemia and their care providers	1		Bozo et al. (2010)	Effects of Illness Representation, Perceived Quality of Information Provided by the Health-Care Professional, and Perceived Social Support on Depressive Symptoms of the Caregivers of Children with Leukemia	1
Patiño-Fernández et al. (2008)	Acute Stress in Parents of Children Newly Diagnosed With Cancer	1		Florence Schmitt et al. (2017)	Multinational Study of Cancer Patients and Their Children: Factors Associated With Family Functioning	2
Nam et al. (2016)	Understanding Psychological Distress among Pediatric Cancer Caregivers	1		Tainan de Cerqueira Nóia et al. (2014)	Coping with the diagnosis and hospitalization of a child with childhood cancer	2
Semerci et al. (2024)	The Predictive Power of Religious Coping on Care Burden, Depression, Stress, and Anxiety of Parents of Pediatric Oncology Patients in Turkey	1		Scarponi et al. (2023)	Emotional, Behavioral, and Physical Health Consequences in Caregivers of Children with Cancer: A Network Analysis Differentiation in Mothers’ and Fathers’ Reactivity	6
Poder et al. (2010)	Parents’ Perceptions of Their Children’s Cancer-Related Symptoms During Treatment: A Prospective, Longitudinal Study	1		Peter L Hudson et al. (2010)	Psychological and Social Profile of Family Caregivers on Commencement of Palliative Care	2
Ochoa et al. (2024)	Hispanic/Latinos and non‐Hispanic whites’ childhood cancer survivors and parents: a dyadic analysis of coping resources and mental health	1		Source: own authorship (2025).
Özmen et al. (2025)	Anxiety, Depression, and Post-Traumatic Stress Disorders in Pediatric Oncology Patients and Their Mothers	1
Koc et al. (2024)	The Effects of Having a Child with Cancer on Parental Psychology: A Cross-Sectional Study	1
Marrakchi et al. (2024)	Psychological distress and coping strategies in parents of children receiving cancer therapy in Morocco – a correlational study	1
Deribe et al. (2024)	Association of Family-Centered Care With Psychological Distress Among Caregivers of Children With Cancer at a Tertiary-Level Hospital in Ethiopia: Cross-Sectional Study	1
Schultz et al. (2019)	On-Line Patient Portal Use By Caregivers in Pediatric Oncology: Are We Widening Sociodemographic Disparities?	1
Marron et al. (2018)	Intended and Unintended Consequences: Ethics, Communication, and Prognostic Disclosure in Pediatric Oncology	1
Stuber et al. (1994)	Post-traumatic stress after childhood cancer II: A family model	1
Wahi et al. (2016)	The Impact of Ethnicity, Language, and Anxiety on Quality of Life in Children with Cancer	1
Edmond et al. (2016)	Emotional Distress and Burden Among Caregivers of Children With Oncological/Hematological Disorders	1
Matthews et al. (2014)	Sleep in Mother and Child Dyads During Treatment for Pediatric Acute Lymphoblastic Leukemia	1
Russell et al. (2022)	Psychosocial risk, symptom burden, and concerns in families affected by childhood cancer	1
Schuster et al. (2020)	Impfungen und Vorsorgeuntersuchungen – Präventionsverhalten bei Nachkommen ehemaliger kinderonkologischer Patienten in Deutschland	1
Castellano-Tejedor et al. (2014)	Surviving cancer: The psychosocial outcomes of childhood cancer survivors and its correlates	1
Levine et al. (2017)	Patients’ and Parents’ Needs, Attitudes, and Perceptions About Early Palliative Care Integration in Pediatric Oncology	1
Sung et al. (2004)	Inpatient Versus Outpatient Management of Low-Risk Pediatric Febrile Neutropenia: Measuring Parents’ and Healthcare Professionals’ Preferences	1
Eden et al. (1994)	Communication with parents of children with cancer	1
Morrow et al. (1984)	The Role of Social Support in Parental Adjustment to Pediatric Cancer	1
Gutie ́ rrez-Colina et al. (2016)	Family Functioning and Depressive Symptoms in Adolescent and Young Adult Cancer Survivors and Their Families: A Dyadic Analytic Approach	1
Giuseppe et al. (2019)	Impact of Videotaped Information on the Experience of Parents of Children with Acute Lymphoblastic Leukemia	1
Kim et al. (2020)	Parental Behaviors, Emotions at Bedtime, and Sleep Disturbances in Children with Cancer	1
Mahoney et al. (2010)	The Association Between Parent’s and Healthcare Professional’s Behavior and Children’s Coping and Distress During Venepuncture	1
Manne et al. (1998)	Posttraumatic Stress Disorder Among Mothers of Pediatric Cancer Survivors: Diagnosis, Comorbidity, and Utility of the PTSD Checklist as a Screening Instrument	1
Ernst et al. (2020)	What's past is prologue: Recalled parenting styles are associated with childhood cancer survivors' mental health outcomes more than 25 years after diagnosis	1
Tager et al. (2024)	Health-related quality of life among pediatric patients with acute lymphoblastic leukemia: An exploratory cross-sectional study	1
Brown et al. (2007)	Adjustment of Children and Their Mothers with Breast Cancer	1
Stockhorst et al. (2000)	Anticipatory Symptoms and Anticipatory Immune Responses in Pediatric Cancer Patients Receiving Chemotherapy: Features of a Classically Conditioned Response?	1
Ibrahim et al. (2025)	Childhood cancer and parental mental health: role of disease severity, socioeconomic status, and social dynamics	1
Ach (2013)	An Analysis of a Model of Risk and Resilience Among Parents of Pediatric Brain Tumor Survivors	1
Tan et al. (2020)	Psychological Distress in Parents of Children with Cancer: A Descriptive Correlational Study	1
Peterson (2013)	Social Support, Parent-Child Communication And Reactions To Pediatric Cancer Medical Procedures	1
Wijnberg- Williams et al. (2006)	Psychological Distress and the Impact of Social Support on Fathers and Mothers of Pediatric Cancer Patients: Long-Term Prospective Results	1
Abate et al. (2017)	Could we use parent report as a valid proxy of child report on anxiety, depression, and distress? A systematic investigation of father–mother–child triads in children successfully treated for leukemia	1
Frank et al. (1997)	Attributions, Coping, and Adjustment in Children with Cancer	1
Laere et al. (2023)	Psychological Functioning of Childhood Cancer Survivors: Longitudinal Associations With the Parental Context	1
Ramsey et al. (2019)	Impact of Race and Socioeconomic Status on Psychologic Outcomes in Childhood Cancer Patients and Caregivers	1
Fardell et al. (2021)	Long-term health-related quality of life in young childhood cancer survivors and their parents	1
Cosquer et al. (2023)	The experience of parents in Ronald McDonald houses in France	1
Ozono et al. (2005)	Family functioning and psychological distress among Japanese breast cancer patients and families	1
Корень and Масихина (2014)	ПОСТСТРЕССОВЫЕ РАССТРОЙСТВА У РОДИТЕЛЕЙ ДЕТЕЙ С ОНКОЛОГИЧЕСКИМИ ЗАБОЛЕВАНИЯМИ НА ЭТАПЕ СТАЦИОНАРНОГО ЛЕЧЕНИЯ	1
Desjardins et al. (2022)	The impact of caregiver anxiety/depression symptoms and family functioning on child quality of life during pediatric cancer treatment: From diagnosis to 6 months	1
Ozono et al. (2010)	Psychological distress related to patterns of family functioning among Japanese childhood cancer survivors and their parents	1
Penn et al. (2008)	Health related quality of life in the first year after diagnosis in children with brain tumours compared with matched healthy controls; a prospective longitudinal study	1
Kazak et al. (1994)	Young Adolescent Cancer Survivors and Their Parents: Adjustment, Learning Problems, and Gender	1
Castellano-Tejedor et al. (2017)	The Hidden Sufferers: Parental Reactions to Childhood Cancer during Treatment and at Survival	1
Bilodeau et al. (2019)	Experience of parents receiving results from a quality-of-life study in pediatric advanced cancer: A report from the PediQUEST study	1
Ahmadia et al. (2025)	Predictive Role of Perceived Social Support and Psychological Distress on Caregiver Burden in Parents of Children With Cancer	1
Ay et al. (2023)	Determining the factors affecting chemotherapy-induced nausea and vomiting in children with cancer	1
Mulhern et al. (1991)	Maternal Depression, Assessment Methods, and Physical Symptoms Affect Estimates of Depressive Symptomatology Among Children with Cancer	2
Ghriwati et al. (2025)	Parent–Child Discrepancies in Reports of Child Psychosocial Functioning in Neurofibromatosis Type 1	2
Herrera et al. (2024)	La funcionalidad conyugal como factor asociado con las diferentes estrategias de afrontamiento al cáncer de mama	2
Bootsma et al. (2020)	Unmet information needs of men with breast cancer and health professionals	2
Thelen and Baust (2025)	Autonomy Development of Adolescents in Paediatric Oncology	2
Özyazicioğlu et al. (2011)	Use of complementary and alternative medicine and the anxiety levels of mothers of children with chronic diseasesjjns_179	2
Zeng et al. (2021)	Hope level and associated factors among parents of retinoblastoma patients during COVID-19 pandemic: a cross-sectional study	2
Harju et al. (2023)	Psychological distress in survivors of childhood cancer and their parents before and after a follow-up appointment: the need for screening and validation of the emotion thermometer	2
Park, et al.(2024)	The Scope of Practice of an Embedded Pediatric Palliative Oncology Clinic	2
Lehmann et al. (2017)	Memories of Parent Behaviors and Adult Attachment in Childhood Cancer Survivors	2
D'Souza et al. (2019)	Internalizing symptoms in AYA survivors of childhood cancer and matched comparisons	2
Elkin et al. (1997)	Psychological Functioning of Adolescent and Young Adult Survivors of Pediatric Malignancy	2
Hechler et al. (2008)	Parents ’ Perspective on Symptoms, Quality of Life, Characteristics of Death and End-of-Life Decisions for Children Dying from Cancer	3
Boldrini (2014)	Percepção dos sintomas e sofrimento no fim da vida das crianças com câncer e repercussões nos cuidadores	3
Haegen et al. (2022)	Parents d ’un enfant atteint de cancer ou en rémission de cancer : une nécessité de les accompagner !	4
Teles et al. (2024)	Interfaces between oncology and psychiatry	4
Low et al. (2024)	Post-traumatic stress disorder and symptoms in paediatric cancer survivors and their family nucleus: systematic review, meta-analysis and meta-regression	4
Rivollet et al. (2022)	La distraction pendant les soins, pensée par les parents d’enfants pris en charge en oncologie	4
Reuther et al. (2025)	Engagement With an Internet-Administered, Guided, Low-Intensity Cognitive Behavioral Therapy Intervention for Parents of Children Treated for Cancer: Analysis of Log-Data From the ENGAGE Feasibility Trial	4
Romo (2022)	Predicting Medication Adherence Patterns During the Predicting Medication Adherence Patterns During the Maintenance Phase of Treatment for Pediatric Leukemia and Maintenance Phase of Treatment for Pediatric Leukemia and Lymphoma: A Model of Individual- and Family-Level Factors Lymphoma: A Model of Individual- and Family-Level Factors	4
Michel et al. (2023)	Acute and long‐term psychosocial consequences in grandparents when a grandchild is diagnosed with cancer – the GROKids Project: a population‐based mixed‐methods study protocol	5
Syed et al. (2024)	HEALTH SERVICES AND QUALITY IMPROVEMENT: LYMPHOID MALIGNANCIES	5
Josephs et al. (2025)	Unmet psycho-social needs of parents of children who die from cancer.	5
Psiquiatria e Psicofarmacologia Clínica (2014)	Parental adjustment, coping styles and locus of control in mothers of children with cancer	5
Umaretiya et al. (2021)	Household material hardships and parental distress in a multicenter clinical trial for pediatric acute lymphoblastic leukemia.	5
J. Vetsch et al. (2016)	LONG-TERM CHILDHOOD CANCER SURVIVORS’ AND PARENTS’ INFORMATION NEEDS: IMPLICATIONS FOR SURVIVORSHIP MODELS OF CARE	5
Carla Crespo et al. (2014)	Family-Centered Care in Pediatric Oncology and Parental Outcomes: Who Benefits and Who Does Not?	5
Felicity Kennedy Harper et al. (2014)	Parent Religiosity/Spirituality and Parent Responses to Pediatric Oncology Treatment Procedures	5
Amy M. Peterson et al. (2014)	The Effect of Social Support on Child and Parent Reactions to Pediatric Cancer Treatment Procedures	5
Heatherlun Uphold et al. (2014)	A Longitudinal Look at Basic Needs of Pediatric Oncology Patients, Their Families and Their Psychosocial Adjustment	5
Kaitlyn Fladeboe (2019)	Perceived financial strain predicts caregiver and child adjustment during the first year of pediatric cancer treatment	5
E. Kiziler et al. (2015)	ADJUSTMENT AND COPING IN PARENTS OF CHILDREN WITH CANCER	5
Harim Kim et al. (2014)	Comparing Psychosocial Adjustment of Korean Childhood Cancer Survivors and Their Mothers to Age and Gender Matched Controls	5
Tamara Klikovac et al. (2013)	Psychological Reactions of Children and Adolescents to Malignant Disease and Treatment and Their Parents’ Reactions - Assessment and Support	5
D. Drew et al. (2013)	GIVE AS MUCH HELP AS YOU CAN, BUT TREAD CAREFULLY’: GRANDPARENTING ACROSS THE GENERATIONS WHEN A GRANDCHILD IS DIAGNOSED WITH CANCER.	5
Sandra Sherman-Bien et al. (2013)	Hospital Design Predictors of Parent Functioning on a Pediatric Oncology Unit: Preliminary Analyses Toward a Physical Environment of Supportive Care	5
Claire E Wakefield et al. (2012)	PREVALENCE OF GRANDPARENTAL DISTRESS, SUPPORT SERVICE USAGE AND BARRIERS TO ACCESS: A COMPARISON OF GRANDPARENTS OF CHILDREN WITH CANCER AND MATCHED CONTROLS	5
Yiouli Ktena et al. (2012)	Family adaptation to childhood cancer and the need for psychosocial intervention	5
Asha Mahajan et al. (2012)	Provision of two full time dedicated pediatric oncology (PO) nurses makes a big difference: Experience from a pediatric cancer care unit (PCU) in a developing country, B. J. wadia children hospital, India	5
Jin-Shei Lai et al. (2012)	Relationship between parent-reported cognition and quality of life reported by pediatric oncology patients	5
Catharine Fleming et al. (2012)	Parent feeding interactions and practices during childhood cancer treatment: A qualitative investigation	5
S Gillis et al. (2012)	Parental anxiety and chronic pain in pediatric oncology patients	5
Jessica Quach et al. (2012)	EARLY PREDICTORS OF DISTRESS IN MOTHERS OF PEDIATRIC CANCER SURVIVORS AT FIVE YEARS POST-DIAGNOSIS	5
Mala Joosten et al. (2012)	PSYCHOSOCIAL FUNCTIONING OF PARENTS OF DUTCH LONG-TERM SURVIVORS OF CHILDHOOD CANCER	5
Sangeetha Thomas et al. (2012)	PARENTAL EXPERIENCES AND MENTAL HEALTH CONCERNS OF PEDIATRIC ONCOLOGY CARE DURING COVID-19 PANDEMIC: A CROSS SECTIONAL STUDY	5
Isabel Josephs et al. (2022)	Unmet psycho-social needs of parents of children who die from cancer	5
D. Khalil et al. (2021)	The Psychosocial Impact of Covid-19 Pandemic on Families of Children with Cancer in Syria	5
Daniel Prior et al. (2021)	Perceived child vulnerability and psychological distress in parents of childhood cancer survivors	5
K. Dolidze (2020)	Patient and parent engagement in pediatric cancer care in the Republic of Georgia	5
C. Signorelli et al. (2018)	How does surgery impact childhood cancer patients? the lasting experiences and needs of survivors and their parents	5
Louis Penner et al. (2011)	Children's personal attributes and caregivers' immediate and longer-term reactions to pediatric cancer treatment	5
Serpil Erermis et al. (2011)	Cancer and family: Evaluation of parental attitudes and characteristcis of children with lymphoma and Leukemia diagnosis	5
Murat Sarisoy et al. (2011)	The effect of 'encounter group application' on mothers' psychological symptom levels at the pediatric oncology clinic	5
Claire Wakefield et al. (2011)	How much sleep are parents getting on the pediatric oncology ward?	5
Min Hee Kim et al. (2010)	Comparison of marital satisfaction between parents of childhood cancer survivors and those of healthy control	5
Marina Kohlsdorf et al. (2009)	Analysis of coping strategies adopted by parents of children and adolescents undergoing leukemia treatment	5
Anna Georg et al. (2018)	Parent-report of emotional and behavioral functioning in a pediatric oncology survivorship program	5
Shin-ichiro Nakagawa et al. (2017)	Perception gap of health-related quality of life between survivors and mothers of childhood brain tumor	5
Eden Robertson et al. (2017)	Decision making in pediatric oncology: Needs, preferences, and experiences of families	5
F. Harper et al. (2016)	The basic needs of parents of children undergoing cancer treatment and their relationship to parents' psychosocial adjustment over time	5
Ramon Tillemans et al. (2016)	What influences quality of life in paediatric cancer survivors?	5
E. Sulkers et al. (2014)	Providing care to a child with cancer: A longitudinal study on the course, predictors, and impact of care giving stress during the first year after diagnosis	5
Afsoon Gaxor et al. (2018)	Prevalence of internalizing problems in pediatric cancer patients at entry into a survivorship clinic	5
Heatherlun Uphold et al. (2013)	Basic needs of pediatric oncology patients, families, and their psychosocial adjustment	5
Dietrich (2014)	Belastungserleben von Eltern krebskranker Kin- der	5
Valenzuela et al. (2024)	“It’s a lot of things”: Household material hardship among Black and Hispanic parents of children with cancer	6
Iwai et al. (2017)	Anxieties felt by CCSs after treatment	6
Barrios et al. (2022)	Emotional Experience and Type of Communication in Oncological Children and Their Mothers: Hearing Their Testimonies Through Interviews	6
DŽOMBIĆ et al. (2022)	‘’WHEN WE CAME HOME, I EXPERIENCED CRISIS” - CAREGIVING EXPERIENCES OF PARENTS WHOSE CHILDREN HAVE UNDERGONE CANCER TREATMENT	6
Battista et al. (2016)	Parent Attributions About Child Symptoms Related to Cancer Therapy	6
Jose and Gawali (2025)	Exploration of Psychosocial Issues of Parents in Pediatric Oncology	6
Priboi et al. (2024)	Psychological distress in grandparents of grandchildren who survived childhood cancer − Results from the GROkids project	6
Gajda et al. (2024)	Impact of pediatric cancer on parents’ relationships	6
Agbayani et al. (2022)	Immunological and psychosocial functioning in parents of children with cancer	6
Haegen et al. (2020)	Évaluation des symptômes somatiques et de la détresse des parents d’un enfant en rémission de cancer	6
Moscato et al. (2023)	Caregivers matter: Neurological vulnerability for pediatric brain tumor survivors	6
Slaughter et al. (2022)	Acculturation discrepancy and mental health associations among Hispanic childhood cancer survivors and their parents	6
Hall (2010)	An Exploratory Study of Communication, Gender-Role Conflict, and Social Support of Parents of Children Treated at Children’s Hospital	6
Peterson et al. (2019)	Emotional symptoms and family functioning in caregivers of children with newly diagnosed leukemia/lymphomas and solid tumors: Short-term changes and related demographic factors	6
Santacroce (2002)	Uncertainty, Anxiety, and Symptoms of Posttraumatic Stress in Parents of Children Recently Diagnosed with Cancer	6
Manne et al. (2004)	Anxiety, Depressive, and Posttraumatic Stress Disorders Among Mothers of Pediatric Survivors of Hematopoietic Stem Cell Transplantation	6
Nelson et al. (1997)	Coping and Support Effects on Mothers’ Stress Responses to Their Child’s Hematopoietic Stem Cell Transplantation	6
Bayat et al. (2008)	Depression, Anxiety, Hopelessness, and Social Support Levels of the Parents of Children With Cancer	6
Yang et al. (2022)	Posttraumatic stress symptoms in Chinese children with ongoing cancer treatment and their parents: Are they elevated relative to healthy comparisons?	6
Hutchinson et al. (2009)	Adjustment of caregivers of pediatric patients with brain tumors: a cross-sectional analysis	6
Speechley and Noh (1992)	Surviving Childhood Cancer, Social Support, and Parents' Psychological Adjustment	6
Bonner et al. (2007)	Brief Report: Psychosocial Functioning of Fathers as Primary Caregivers of Pediatric Oncology Patients	6
Salvador et al. (2018)	Family Management of Pediatric Cancer: Links with Parenting Satisfaction and Psychological Distress	6
Link et al. (2016)	The Relationship Between Parent Trait Anxiety and Parent-reported Pain, Solicitous Behaviors, and Quality of Life Impairment in Children With Cancer	6
Norberg et al. (2007)	Parents’ Perceptions of Support When a Child Has Cancer	6
Ay et al. (2023)	Prediction of family-centered care on the unmet care needs of parents of pediatric oncology patients and their psychosocial problems	6
Xu et al. (2025)	Moderating effects of screen time on the relationship between family functioning and negative emotions in Chinese children with cancer	6
Khoury et al. (2024)	Anxiety and Decision-making among Parents Coping with Childhood Cancer during the First Year of Treatment	6
Zhao et al. (2023)	Association between adult attachment style, communication patterns and caregiver burden in parents of children with solid tumors: A cross-sectional study	6
Sigmund et al. (2025)	The psychosocial situation of parents of children with cancer during aftercare - Results of a qualitative study	6
Eyigor et al. (2011)	The Quality of Life and Psychological Status of Mothers of Hospitalized Pediatric Oncology Patients	6
Ohlsen et al. (2025)	Financial toxicity among pediatric oncology families during therapy and early survivorship: a qualitative analysis	6
Cho et al. (2020)	Health behaviors of caregivers of childhood cancer survivors: a cross-sectional study	7
Goldbeck et al. (1998)	Familial coping with cancer in childhood and adolescence. Possibilities for standardized assessment with a self-assessment method: results of an empirical pilot study	NE
Bunin et al. (1996)	Informing subjects of epidemiologic study results. Children's Cancer Group	NE
Source: own authorship (2025).

## Sheet: family information + instrument
	Author (year)	Education	Family income	Marital status	Occupation	Anxiety symptoms	Symptoms of depression
	Yılancıoğlu (2024)	elementary education (mother 52% and father 63%)	-	-	-	HADS
	Terrasson et al. (2023)	40% higher education	-	93% married	80% exercise professional activity	HADS
	Hsu et al. (2021)	40% higher education	-	87% married	67% part-time	PROMIS
	Wikman et al. (2018)	48% high school	-	-	-	BAI	BDI-II
	Neu et al. (2014)	27% higher education	-	85% married	46% part-time and full-time	HADS
	Haegen et al. (2018)	45% higher education	-	53% married/partnered	-	HADS
	Hannah Kurz et al. (2025)	50.4% > 10 years	46.1% average status	77.2% married	77.8% paid employee	GAD-7	PHQ-9
	Quast et al. (2021)	52% higher education	34% between $75,000–$124,999	-	-	PROMIS	-
	Lewandowska et al. (2024)	57% higher education	55% financial situation "good"	62% married	-	HADS *	BDI
	Jayaganapathy et al. (2020)					DASS-21
	Christen et al. (2022)	48.5% higher education	55% medium/high (≥6,000 CHF)	-	53% employed	WAQ	-
	Meeske et al. (2013)	33% elementary education**	41% between 10–35 thousand	69% married	-	-	CES-D
	Koyu et al. (2020)	34.9% elementary education	65% revenue equals expense	-	83% unemployed	STAI	BDI
	Burns et al. (2020)	52% with a school degree	-	90% single	average of 3.20 hours of paid work	DASS-21
	McCarthy et al. (2021)	29% higher education	-	83% married	34% part-time	DASS-22
	McLoone et al. (2013)	57% without a school degree	-	92% partner	average of 2.10 hours of paid work	DASS-23
	Elkin et al. (2007)	-	-	56% partner	-	-	BDI-II
	Peterson et al. (2018)					BSI
	Burns et al. (2018)	46% higher education	47% income above $49,999	100% married	69% full time	BSI
	Vernon et al. (2016)	75% higher education**	-	45% married**	-	DASS-21
	Vitorino et al. (2018)	-	53.2% financial problems	-	81% employed/retired	-	BDI
	Zhao et al. (2023)	34% high school	-	-	-	HADS
	Wilford (2018)	64% higher education	-	86% married	-	PROMIS
	Ghufran et al. (2014)	55% higher education	65% above 50,000	-	95% housewife	-	HAM-D
	I.Vlachos et al. (2023)	48% elementary education	-	92% partner	-	HADS
	Bemis et al. (2015)	Average of 13.9 years of education	26.8% between $25,001–50,000	72% married/partnered	-	-	BDI-II
	Katz et al. (2018)	-	-	78.3% married	-	DASS-21 *	CES-D
	Allen et al. (1997)					STAI	BDI
	Santo et al. (2011)	59.4% elementary education**	-	75% married	65.6% of the home	-	BDI
	Greening et al. (2007)	-	-	60% married	-	STAI	BDI-II
